# Supplementary material for: Apc Mutation Enhances PyMT-Induced Mammary Tumorigenesis
Source: PubMed Central journal article supplement (PMC3245255; doi:10.1371/journal.pone.0029339), 2011-12-22

Figure S1

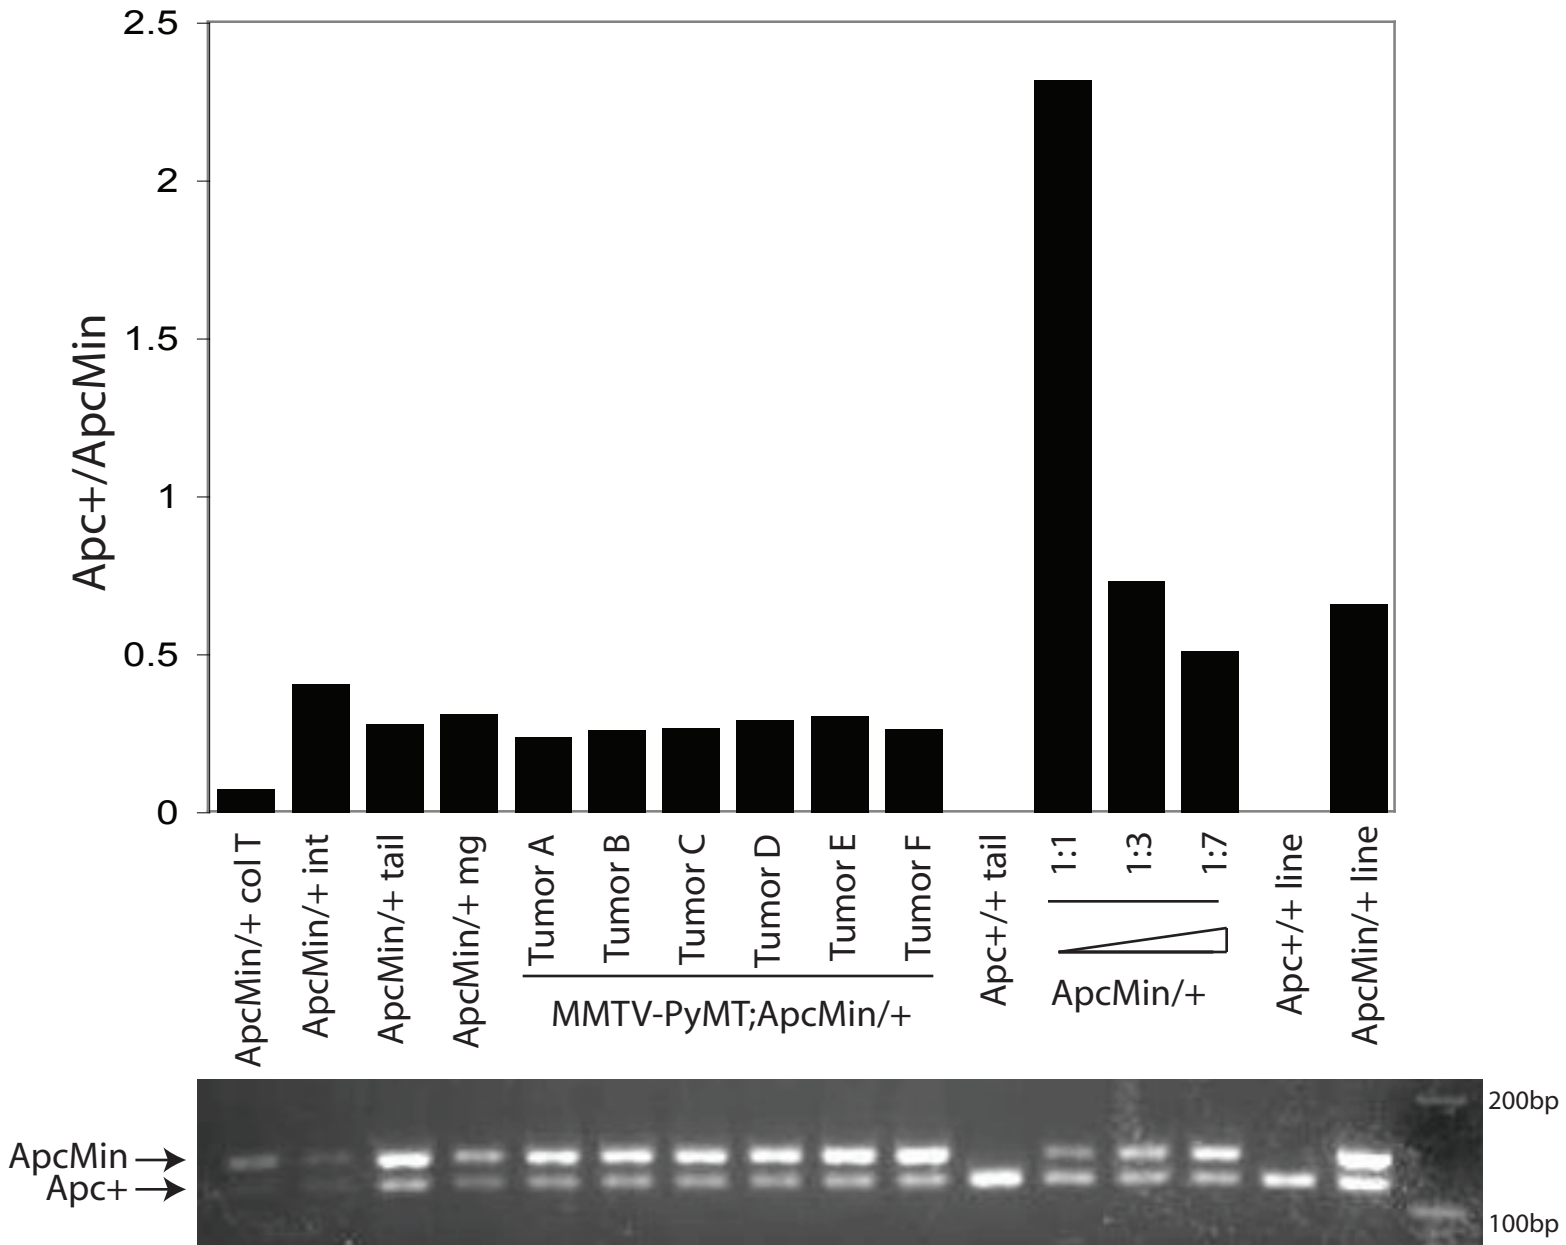

Supplement: pone.0029339.s001.pdf [file pone.0029339.s001.pdf]
