# Supplementary material for: Apc Mutation Enhances PyMT-Induced Mammary Tumorigenesis
Source: PubMed Central journal article supplement (PMC3245255; doi:10.1371/journal.pone.0029339), 2011-12-22

Figure S3

A

MMTV-PyMT;*Apc*<sup>+/+</sup>

MMTV-PyMT;*ApcMin*<sup>+/+</sup>

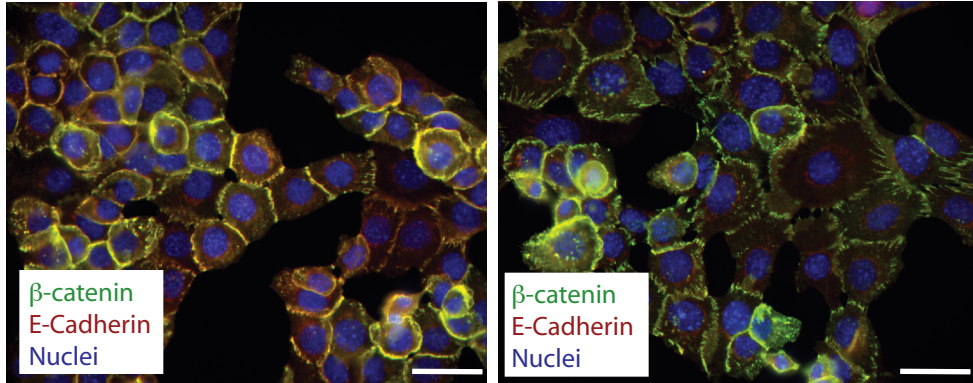

B

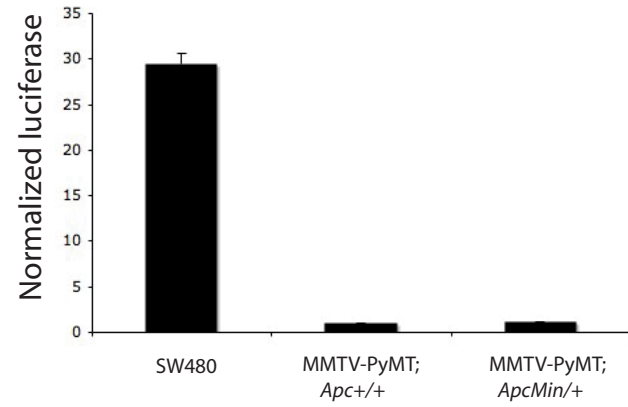

C

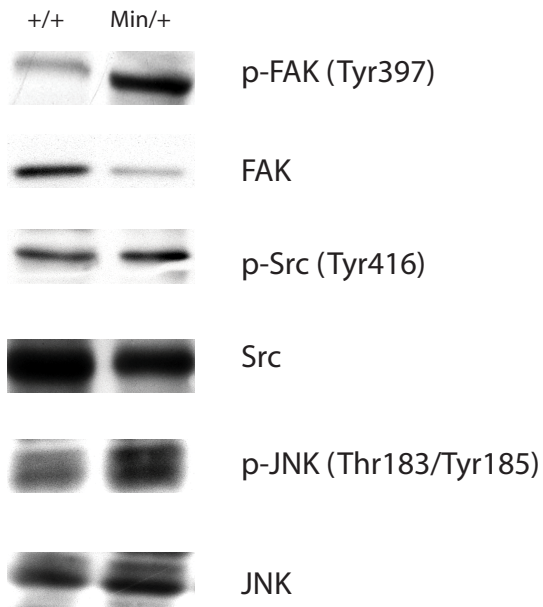

D

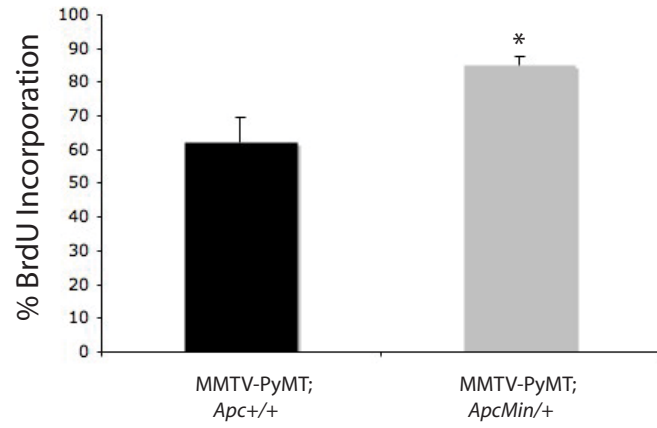

E

MMTV-PyMT;*Apc*<sup>+/+</sup>

MMTV-PyMT;*ApcMin*<sup>+/+</sup>

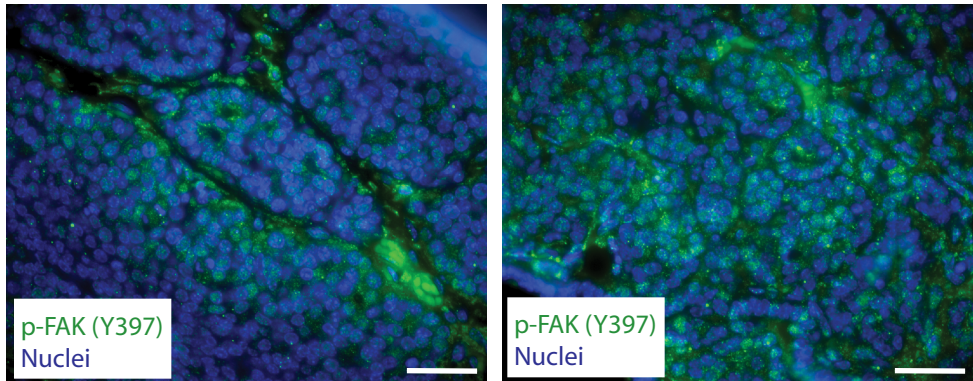

Supplement: pone.0029339.s003.pdf [file pone.0029339.s003.pdf]
